# Supplementary material
Source: Springer Nature journal article supplement (https://www.springermedizin.de/resource/supplementary/12879_2011_1930_MOESM2_ESM.pdf/9443320)

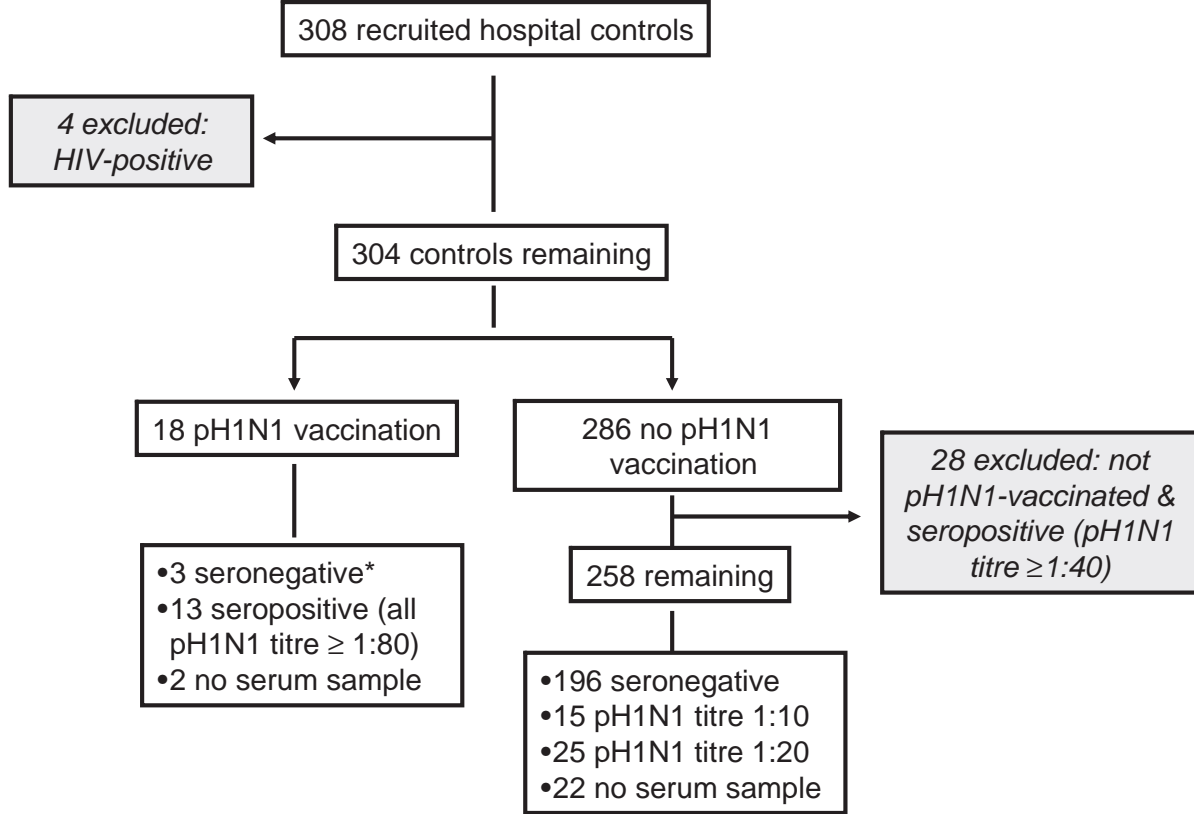

\* Vaccination documented in vaccination record (2) or by family doctor (1)

Supplement: MOESM2 [file 9443320]
